# Supplementary material for: Development of a Nuclear Fuel Dissolution Monitor Based on Raman Spectroscopy
Source: MDPI journal article supplement (doi:10.3390/s24020607), 2024-01-18
Supplement: s1 [file s1]

Supplemental Materials for: “Development of a Nuclear Fuel Dissolution Monitor Based on Raman Spectroscopy”, by R. Lascola, P.E. O’Rourke, and D.M. Immel. To be published in *Sensors*.

Figures S1 and S2 demonstrate the extent to which Raman lines associated with H<sub>2</sub> (Figure S1) and N<sub>2</sub>O and NO (Figure S2) were not observable during periods of peak gas evolution during a dissolver run. Expected positions for these analytes are indicated with arrows. The NO<sub>2</sub> levels for the spectra used to calculate the average spectrum were generally greater than 1%. The 1876 cm<sup>-1</sup> NO peak is coincident with a small NO<sub>2</sub> line; however, the intensity ratio of this peak to nearby NO<sub>2</sub> peaks is consistent with ratios observed for spectra of NO<sub>2</sub> by itself. Thus, there is no visual evidence for the NO peak. This coincidence of lines is one important reason for the comparatively large LOD for NO compared to other species. Assuming that the LOD improves with the square root of the number of averages, the absence of evidence for N<sub>2</sub>O, NO, and H<sub>2</sub> in the highly averaged spectra suggests that the concentrations of those species during peak dissolver emission are no greater than  $1/\sqrt{112} = 0.094\times$  the LODs shown in Table 1 of the paper.

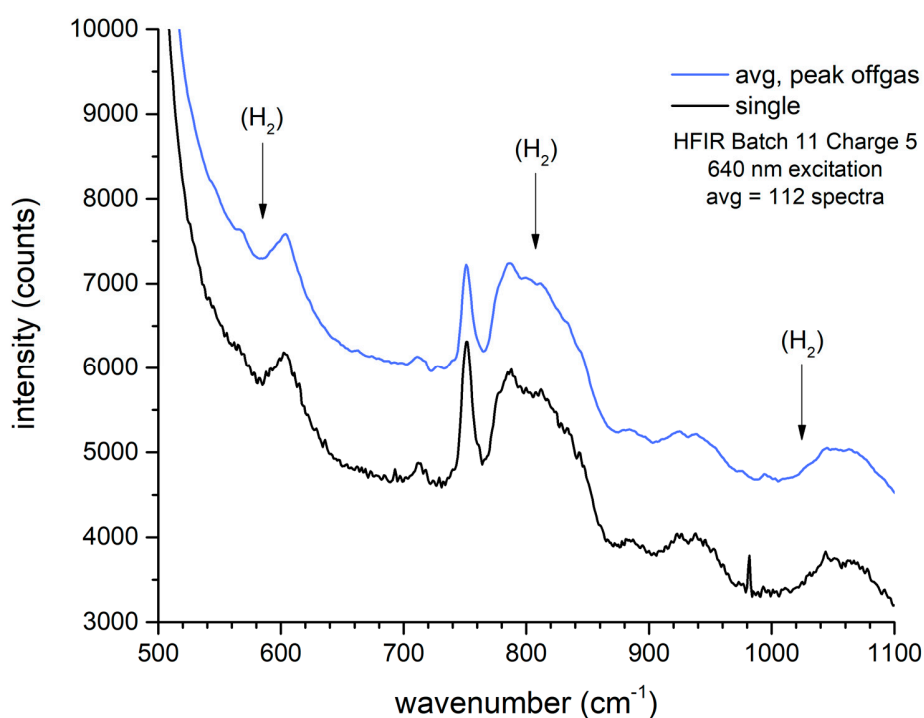

**Figure S1.** Absence of observed H<sub>2</sub> Raman scattering lines in spectra obtained at peak gas emission during a representative dissolver run.

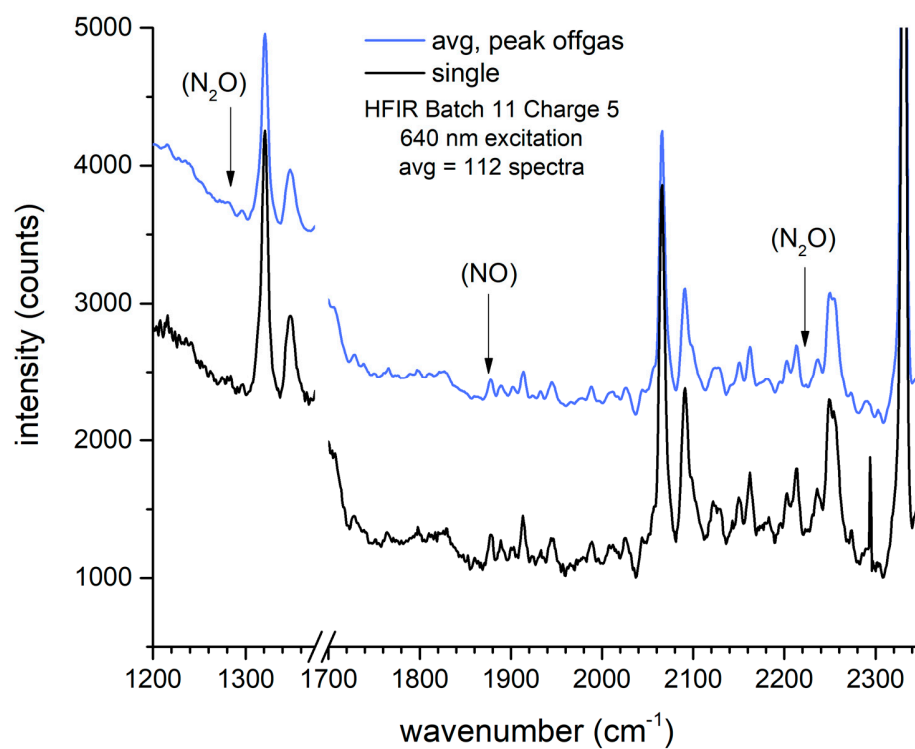

**Figure S2.** Absence of observed  $\text{N}_2\text{O}$  and  $\text{NO}$  Raman scattering lines in spectra obtained at peak gas emission during a representative dissolver run.

In the main text, we describe a relationship between measured %NO<sub>2</sub> concentrations and fuel fragment height in the dissolver. This relationship is applied to data obtained for 5 runs for which there are consistent conditions, such that the results can be reasonably compared. These conditions include Raman excitation wavelength, fuel type, dissolver identity, and dissolver condition (most specifically, the dissolver lid being leak-tight). We also state that a total of 15 dissolver runs were monitored. The other 10 runs did not have a similarly consistent set of conditions to further test the relationship between probe height and gas measurements. A summary of the operating parameters and Raman spectroscopy configuration is shown in Table S1.

**Table S1.** Summary of operating and monitoring conditions for dissolver runs.

| Fuel Type / Batch | Charge Number | Raman Laser | Comments                                    |
|-------------------|---------------|-------------|---------------------------------------------|
| MTR #22           | 1             | 640 nm      | Dissolver not fully sealed; offgas diluted. |
|                   | 2             |             | Dissolver not fully sealed; offgas diluted. |
|                   | 3             |             | Dissolver not fully sealed; offgas diluted. |
| MTR #24           | 1             | 532 nm      | Dissolver not fully sealed; offgas diluted. |
|                   | 2             |             | Dissolver not fully sealed; offgas diluted. |
|                   | 3             |             | Dissolver not fully sealed; offgas diluted. |
| MTR #26           | 1             | 532 nm      | All systems normal.                         |
|                   | 2             |             | Raman instrument malfunction.               |
| HFIR #11          | 1             | 640 nm      | All systems normal.                         |
|                   | 2             |             | All systems normal.                         |
|                   | 3             |             | All systems normal.                         |
|                   | 4             |             | All systems normal.                         |
|                   | 5             |             | All systems normal.                         |
| HFIR #13          | 1             | 532 nm      | All systems normal.                         |
|                   | 2             |             | All systems normal.                         |
|                   | 3             |             | Steam turned off mid-run for approx. 13h.   |
|                   | 4             |             | (not monitored)                             |
|                   | 5             |             | (not monitored)                             |
